# Supplementary material
Source: bioRxiv or medRxiv preprint supplement (https://medrxiv.org/highwire/filestream/80649/field_highwire_adjunct_files/4/2020.05.08.20095943-4.pdf)
Supplement: Supplementary file [file 2020.05.08.20095943-4.pdf]

Table 2 Case Fatality Rate % by occupation in Ecuador due to COVID-19. Relative risk was estimated using the White-Collar jobs as a reference group. Significance was set at an alpha level of 0.05.

| Work Activity                                    | COVID-19 Deaths | COVID-19 Cases | CFR % | Relative Risk | p value          | Lower limit (CI 95%) | Upper limit (CI 95%) | Likelihood of Outcome |
|--------------------------------------------------|-----------------|----------------|-------|---------------|------------------|----------------------|----------------------|-----------------------|
| <b>Politicians*</b>                              | 0               | 18             | 0.0%  | 0.016         | <b>0.004</b>     | <b>0.001</b>         | <b>0.273</b>         | -98%                  |
| <b>Registered Nurses</b>                         | 1               | 309            | 0.3%  | 0.1           | <b>0.023</b>     | <b>0.013</b>         | <b>0.732</b>         | -90%                  |
| <b>Health Care professionals no physicians**</b> | 4               | 583            | 0.7%  | 0.211         | <b>0.003</b>     | <b>0.074</b>         | <b>0.600</b>         | -79%                  |
| <b>Medical doctors</b>                           | 14              | 876            | 1.6%  | 0.487         | <b>0.027</b>     | <b>0.257</b>         | <b>0.923</b>         | -51%                  |
| <b>Dentist</b>                                   | 1               | 32             | 3.1%  | 0.939         | 0.062            | 0.131                | 6.705                | -6%                   |
| <b>White Collar Jobs***</b>                      | 27              | 810            | 3.3%  | Ref.          | Ref.             | Ref.                 | Ref.                 | Ref.                  |
| <b>Civil Services<sup>o</sup></b>                | 16              | 324            | 4.9%  | 1.458         | 0.221            | 0.796                | 2.672                | 46%                   |
| <b>Others</b>                                    | 26              | 405            | 6.4%  | 1.870         | <b>0.019</b>     | <b>1.10</b>          | <b>3.164</b>         | 87%                   |
| <b>Blue Collar<sup>†</sup></b>                   | 186             | 1,390          | 13.4% | 3.658         | <b>&lt;0.001</b> | <b>2.465</b>         | <b>5.433</b>         | 266%                  |
| <b>Unemployed</b>                                | 53              | 314            | 16.9% | 4.476         | <b>&lt;0.001</b> | <b>2.863</b>         | <b>6.999</b>         | 348%                  |
| <b>Retired</b>                                   | 39              | 175            | 22.3% | 5.649         | <b>&lt;0.001</b> | <b>3.541</b>         | <b>9.013</b>         | 465%                  |
| <b>Prisoner</b>                                  | 1               | 3              | 33.3% | 7.75          | <b>0.020</b>     | <b>1.363</b>         | <b>44.04</b>         | 675%                  |
| <b>No Information</b>                            | 106             | 4,229          | 2.5%  | N/A           | N/A              | N/A                  | N/A                  | N/A                   |
| <b>Total</b>                                     | 474             | 9,468          | 5.0%  | N/A           | N/A              | N/A                  | N/A                  | N/A                   |

N/A= Not applied; \*Diplomatic, City Mayor, political advisor and city/provincial councilors, \*\* Hospital and Minister of Public Health administrative personnel, Medical Student nursing assistant, hospital cellars, Medical Assistant, Therapists, Laboratory, X-ray and Pharmacy Technician, Diagnostic Medical Sonographer, primary health care technicians (TAPS), physiotherapist, obstetricians and paramedics. \*\*\*Engineers, lawyer, auditors, psychologist, chefs, architect, communicator, teachers, managers, Chief executive Officers, entrepreneurs, analysts, administrator. <sup>o</sup>Military soldiers and army staff, Navy personal, Transit agents, Policemen, Security guards, Jail security agents. <sup>†</sup>Informal merchants, kitchen staff, Housework, Domestic Services employees, informal driver, Farmers, Craftsman, Machine operators, Cleaning Services employees, mechanics, carpenters and construction workers.
